# Supplementary material for: T-cell dysfunction in CLL is mediated through expression of Siglec-10 ligands CD24 and CD52 on CLL cells
Source: PubMed Central journal article supplement — Blood Adv. 2024 Jul 25;8(17):4633–46. doi: 10.1182/bloodadvances.2023011934 (PMC11401197; doi:10.1182/bloodadvances.2023011934), 2024-07-25
Supplement: BLOODA_ADV-2023-011934-mmc1.pdf [file BLOODA_ADV-2023-011934-mmc1.pdf]

1 **Supplementary material**

2

3 **Supplementary Methods**

4 *Flow cytometry*

5 Fluorescently labeled antibodies were used to detect cell surface markers and intracellular proteins  
6 (supplementary table 2) . Cells were stained as previously described<sup>1</sup>. In short: cells were harvested and  
7 stained on ice for 20 minutes with fluorescently labeled antibodies in PBA; a solution of 0.5% bovine serum  
8 albumin and 0.02% sodium azide in PBS. Cells were then washed in PBA, resuspended in an appropriate  
9 volume of PBA and acquired on an LSR Fortessa (BD Biosciences).

10

11 *Cell culture*

12 PBMCs from CLL patients and HD were thawed and either directly analyzed or cultured for 1-29 days as  
13 indicated. PBMCs, CAR-T cells, the mantle cell lymphoma (MCL) cell line JeKo-1 (CRL-3006; ATCC), and the  
14 NIH3T3 fibroblast (3T3) and CD40L-transfected NIH3T3 fibroblast (3T40) cell lines were cultured in RPMI  
15 1640 (#22400089; Gibco) supplemented with 10% FCS by volume and supplemented with Penicillin and  
16 Streptomycin (#15140-122; ThermoFisher Scientific) at 37°C and 5% CO<sub>2</sub>. All final PBMC concentrations  
17 were adjusted to 3\*10<sup>6</sup> cells per ml. T cells were stimulated using soluble anti-CD3 IgM (91 ng/μl, clone  
18 1XE; Sanquin) and anti-CD28 IgG (3 μg/ml, clone 15E8; Sanquin). CLL cells were co-cultured with 3T3 or  
19 3T40 cells as previously described<sup>23,24</sup>. After 2 days of culturing CLL cells with either 3T3 or 3T40 cells with

20 or without ibrutinib (S2680, Selleckchem; 0.1  $\mu$ M, or 1  $\mu$ M), imatinib (13139, Cayman Chemical) (1  $\mu$ M),  
21 dasatinib (S1021, Selleckchem) (1  $\mu$ M), and Bay 11-7082 (196870, Calbiochem) (250 nM), CLL cells were  
22 detached by gently resuspending the cell culture medium. The kinase inhibitors were washed away  
23 thoroughly before proceeding an autologous T cell co-culture. The treated or untreated CLL cells were  
24 then co-cultured in a 1:1 ratio with autologous PBMCs.

25

#### 26 *CAR T-cell production*

27 To generate CAR-T cells, 293T cells (CRL-3216, ATCC) were transfected at 80% confluency with 15  $\mu$ g of  
28 the lentiviral vector encoding the anti-CD19 4-1BB CAR (CAR19, Tisagenlecleucel; Novartis)<sup>7</sup>, and  
29 packaging plasmids pRSV REV (18  $\mu$ g, Rev expression plasmid; plasmid #12253, Addgene), pMDLg/p RRE  
30 (18  $\mu$ g, Gag/Pol expression plasmid; plasmid #12251, Addgene), and pVSV-G (7  $\mu$ g, VSV glycoprotein  
31 expression plasmid; plasmid #138479, Addgene) using Lipofectamine 20000 (11668019, ThermoFisher).  
32 The lentivirus was harvested after 24 hours, and concentrated by ultracentrifugation. Prior to transduction  
33 with the CAR19 encoding lentivirus, T cells were purified from PBMCs from HD or CLL patients using a  
34 negative T-cell selection kit following manufacturer's instructions (17951; StemCell). T cells were  
35 stimulated using CD3/CD28 coated beads according to manufacturer's instructions (11131D;  
36 ThermoFisher Scientific), and supplemented with 100 U/ml recombinant human IL-2 (200-02; Peprotech).  
37 24h post activation, the T cells were transduced with the lentiviral particles encoding CAR19. The CAR-T  
38 cells were subsequently expanded for 2 weeks to obtain sufficient CAR-T cells while the cell culture media

39 was refreshed every 3-4 days. Purified CAR-T cells were obtained by staining CAR-T cells with biotinylated  
40 protein L (29997, ThermoFisher Scientific), and Streptavidin (554061, BD Biosciences), and subsequently  
41 cell sorting using a BD FACSAria™ II.

42

#### 43 *RNA sequencing*

44 FACS sorted CLL cells (based on CD19 positivity and cell viability using the SH800 Cell Sorter (Sony)) were  
45 cultured for 48 hours on 3T3 fibroblasts, 3T40 fibroblasts or 3T40 fibroblasts with Dasatinib (100 nM). The  
46 cells were pelleted and total RNA was isolated using the RNeasy Mini kit (Qiagen) according to the  
47 manufacturer's protocol. RNA quality was assessed using the High Sensitivity RNA ScreenTape (Agilent  
48 Technologies). Sequencing libraries were prepared with the KAPA mRNA HyperPrep kit (Roche), all  
49 samples were amplified for 14 cycles. Barcoded samples were pooled based on Qubit DNA HS  
50 (ThermoFisher Scientific) measurement and sequenced on Illumina HiSeq 4000 (Illumina) using a single-  
51 read 50 bp standard protocol. Sequencing depth was approximately 20M reads per sample. Raw FASTQ  
52 files were subjected to quality control using FastQC and trimmed using Trimmomatic (v0.32). Reads were  
53 aligned to the human reference genome (GRCh38/hg38) using HISAT2(v2.1.0)<sup>2</sup>. Gene level counts were  
54 obtained using HTSeq (v0.11.0) and the human GTF (gene transfer format) file from Ensembl (release 94).  
55 X and Y chromosomal genes were removed prior to differential expression analysis due to a large sex-  
56 specific effect. Differential expression was assessed with DESeq2<sup>3</sup>, using an FDR cut-off of 0.05.  
57 Differentially expressed genes (DEGs) between the different conditions were used for retrieving the

58 inversely regulated genes, which were defined as genes that changed in opposite directions comparing  
59 the 3T40 vs 3T3 DEGs with the 3T40 + dasatinib vs 3T40 DEGs. From this set of genes, those involved in  
60 contact-dependent cell-cell interactions were extracted using the publicly available ligand-receptor pair  
61 repository curated by Armingol et al. 2021 (<https://github.com/LewisLabUCSD/Ligand-Receptor-Pairs>)<sup>4,5</sup>.  
62 Plots were generated with ggplot2 (Bioconductor)<sup>6</sup> and gplots (CRAN) using R<sup>7</sup>, Bioconductor and  
63 Rstudio<sup>8,9</sup>.

64 **Supplementary table 1** Characteristics of treatment-naive CLL patients included in this study

| ID | Sex    | Age | Rai Stage | Mutation Status | Leuco *10 <sup>9</sup> /L | % CD5+ CD19+ | % CD3+ | CMV Status |
|----|--------|-----|-----------|-----------------|---------------------------|--------------|--------|------------|
| 1  | Male   | 72  | 0         | Mutated         | 71.4                      | 96.7         | 1.7    | +          |
| 2  | Female | 74  | 0         | Mutated         | 39.6                      | 96.9         | 7.1    | +          |
| 3  | Male   | 66  | I         | Mutated         | 36.2                      | 89.9         | 6.7    | +          |
| 4  | Female | 69  | I         | Mutated         | 30.1                      | 85.7         | 6.9    | N.D.       |
| 5  | Male   | 65  | 0         | N.D.            | 127                       | 55.7         | 1.6    | N.D.       |
| 6  | Male   | 68  | I         | Mutated         | 39                        | 19.5         | 0.4    | N.D.       |
| 7  | Male   | 27  | N.D.      | Unmutated       | 286                       | 65.4         | 0.6    | +          |
| 8  | Female | 55  | N.D.      | Mutated         | 92.6                      | 91.9         | 5.4    | N.D.       |
| 9  | Male   | 73  | 0         | N.D.            | 129.7                     | 91.7         | 0.3    | +          |
| 10 | Female | 60  | 0         | Mutated         | 152                       | 91.8         | 5.2    | +          |
| 11 | Male   | 56  | 0         | Mutated         | 123.33                    | 92.9         | 2.4    | +          |
| 12 | Male   | 74  | II        | Mutated         | 69.67                     | 96.8         | 2.3    | +          |
| 13 | Female | 74  | 0         | Mutated         | 59.6                      | 91           | 3.1    | +          |
| 14 | Male   | 72  | 0         | Unmutated       | 77.8                      | 93.08        | 4.55   | +          |
| 15 | Female | 62  | I         | Mutated         | 139                       | 91.7         | 9.1    | N.D.       |
| 16 | Male   | 66  | I         | N.D.            | 90.92                     | 96.14        | 2.94   | N.D.       |
| 17 | Male   | 66  | IV        | Mutated         | 41.06                     | 82.7         | 15.86  | N.D.       |
| 18 | Male   | 66  | 0         | N.D.            | 51.1                      | 88.45        | 9.67   | N.D.       |
| 19 | Female | 70  | N.D.      | N.D.            | 24.87                     | 90.68        | 7.59   | N.D.       |
| 20 | Male   | 55  | 0         | N.D.            | 69.64                     | 92.33        | 6.05   | N.D.       |
| 21 | Female | 57  | 0         | Mutated         | 89.9                      | 95.89        | 3.55   | N.D.       |
| 22 | Male   | 58  | II        | Mutated         | 116.93                    | 94.81        | 4.73   | +          |
| 23 | Female | 79  | 0         | N.D.            | 50.39                     | 90.91        | 7.64   | N.D.       |
| 24 | Male   | 61  | III       | Mutated         | 200.68                    | 94.82        | 4.43   | -          |

|           |        |    |      |           |        |       |       |      |
|-----------|--------|----|------|-----------|--------|-------|-------|------|
| <b>25</b> | Female | 75 | N.D. | Unmutated | 85.54  | 87.45 | 10.21 | N.D. |
| <b>26</b> | Male   | 64 | 0    | Mutated   | 52.26  | 94    | 4.69  | +    |
| <b>27</b> | Female | 69 | I    | Mutated   | 76.82  | 90.29 | 7.49  | N.D. |
| <b>29</b> | Female | 63 | II   | Mutated   | 60.37  | 86.44 | 12.02 | N.D. |
| <b>30</b> | Female | 70 | N.D. | Mutated   | 223.94 | 94.98 | 4.34  | N.D. |
| <b>31</b> | Male   | 66 | N.D. | Mutated   | 221.75 | 95.62 | 3.66  | +    |
| <b>32</b> | Female | 62 | 0    | Mutated   | 91.81  | 91.67 | 7.34  | +    |
| <b>33</b> | Female | 69 | I    | Mutated   | 91.17  | 93.59 | 5.29  | N.D. |
| <b>34</b> | Male   | 67 | 0    | Mutated   | 118.03 | 98.09 | 1.77  | N.D. |
| <b>35</b> | Male   | 51 | N.D. | Mutated   | 167.31 | 96.05 | 3.06  | +    |
| <b>36</b> | Female | 60 | N.D. | N.D.      | 124.82 | 96.16 | 3.19  | N.D. |
| <b>37</b> | Male   | 71 | 0    | N.D.      | 19.89  | 89.18 | 8.64  | N.D. |
| <b>38</b> | Female | 68 | 0    | Mutated   | 24.5   | 90.1  | 6.8   | -    |
| <b>39</b> | Male   | 73 | N.D. | Mutated   | 29.5   | 89.3  | 3.8   | N.D. |
| <b>40</b> | Female | 83 | I    | Mutated   | 25.05  | 85.25 | 11.75 | +    |
| <b>41</b> | Male   | 79 | I    | Mutated   | 44.9   | 74    | 2.4   | -    |
| <b>42</b> | Male   | 59 | III  | Mutated   | 58.7   | 93    | 4.4   | -    |
| <b>43</b> | Male   | 75 | II   | Mutated   | 58.4   | 92.7  | 1.7   | +    |
| <b>44</b> | Female | 77 | 0    | Unmutated | 55.87  | 88.68 | 3.65  | N.D. |
| <b>45</b> | Male   | 81 | I    | Mutated   | 183.48 | 78    | 1.2   | -    |
| <b>46</b> | Male   | 60 | III  | Mutated   | 85.2   | 93.7  | 5.7   | -    |
| <b>47</b> | Male   | 81 | N.D. | Mutated   | 85.2   | 98.23 | 1.42  | +    |

65 N.D.: Not determined, +: Positive, -: Negative

66

67 **Supplementary table 2**

| <b>Marker</b> | <b>Manufacturer</b> | <b>Product ID</b> |
|---------------|---------------------|-------------------|
| <b>CD3</b>    | eBioscience         | 56-0038-82        |
| <b>CD4</b>    | BD Biosciences      | 555349            |
| <b>CD4</b>    | Biolegend           | 317442            |
| <b>CD5</b>    | eBioscience         | 12-0059-42        |
| <b>CD8</b>    | BD Biosciences      | 580347            |
| <b>CD8</b>    | BD Biosciences      | 563823            |
| <b>CD19</b>   | BD Biosciences      | 555415            |
| <b>CD19</b>   | Beckman             | IM3628            |
| <b>CD24</b>   | Biolegend           | 311120            |
| <b>CD25</b>   | BD Biosciences      | 340907            |
| <b>CD25</b>   | BD Biosciences      | 563701            |
| <b>CD27</b>   | BD Biosciences      | 563816            |
| <b>CD45RA</b> | BD Biosciences      | 563953            |
| <b>CD45RA</b> | Biolegend           | 304135            |
| <b>CD52</b>   | Biolegend           | 316004            |
| <b>CD54</b>   | Biolegend           | 322720            |

|                               |                |            |
|-------------------------------|----------------|------------|
| <b>CD58</b>                   | Biolegend      | 330916     |
| <b>CD70</b>                   | Biolegend      | 355111     |
| <b>CD71</b>                   | BD Biosciences | 563768     |
| <b>CD71</b>                   | eBioscience    | 11-0719-41 |
| <b>CD80</b>                   | eBioscience    | 11-0809-41 |
| <b>CD86</b>                   | BD Biosciences | 555660     |
| <b>CD95</b>                   | BD Biosciences | 564710     |
| <b>CD107a</b>                 | Biolegend      | 561348     |
| <b>PD-1</b>                   | BD Biosciences | 561272     |
| <b>PD-L1</b>                  | Biolegend      | 329731     |
| <b>4-1BBL</b>                 | Biolegend      | 311507     |
| <b>OX-40L</b>                 | Biolegend      | 326307     |
| <b>MHC-I</b>                  | Biolegend      | 311438     |
| <b>MHC-II</b>                 | Biolegend      | 361716     |
| <b>Siglec-10</b>              | BD Biosciences | 566588     |
| <b>Siglec-10</b>              | Biolegend      | 347603     |
| <b>IFN<math>\gamma</math></b> | BD Biosciences | 563563     |
| <b>IL-2</b>                   | BD Biosciences | 340450     |
| <b>TNF<math>\alpha</math></b> | BD Biosciences | 557996     |
| <b>Granzyme B</b>             | BD Biosciences | 562462     |
| <b>Perforin</b>               | Antibodychain  | 2140540    |

68

## 69 **Supplementary references**

- 70 1. Bruggen JAC van, Martens AWJ, Fraietta JA, et al. Chronic lymphocytic leukemia cells impair  
71 mitochondrial fitness in CD8+ T cells and impede CAR T-cell efficacy. *Blood*. 2019;134(1):44-58.  
72 doi:10.1182/blood.2018885863
- 73 2. Kim D, Paggi JM, Park C, Bennett C, Salzberg SL. Graph-based genome alignment and genotyping with  
74 HISAT2 and HISAT-genotype. *Nat Biotechnol*. 2019;37(8):907-915. doi:10.1038/s41587-019-0201-4
- 75 3. Love MI, Huber W, Anders S. Moderated estimation of fold change and dispersion for RNA-seq data  
76 with DESeq2. *Genome Biol*. 2014;15(12):550. doi:10.1186/s13059-014-0550-8
- 77 4. Armingol E, Officer A, Harismendy O, Lewis NE. Deciphering cell-cell interactions and communication  
78 from gene expression. *Nat Rev Genet*. 2021;22(2):71-88. doi:10.1038/s41576-020-00292-x
- 79 5. Jin S, Guerrero-Juarez CF, Zhang L, et al. Inference and analysis of cell-cell communication using  
80 CellChat. *Nat Commun*. 2021;12(1):1088. doi:10.1038/s41467-021-21246-9
- 81 6. Wickham H. *Ggplot2: Elegant Graphics for Data Analysis*. 2nd Edition. Springer; 2009.  
82 doi:10.1007/978-0-387-98141-3

83 7. Team RC. R: A language and environment for statistical computing. Published 2021. [https://www.R-](https://www.R-project.org/)  
84 [project.org/](https://www.R-project.org/)

85 8. Huber W, Carey VJ, Gentleman R, et al. Orchestrating high-throughput genomic analysis with  
86 Bioconductor. *Nat Methods*. 2015;12(2):115-121. doi:10.1038/nmeth.3252

87 9. Team Rs. RStudio: Integrated Development for R. Published 2020. <http://www.rstudio.com/>

88

89

90 Supplemental figures

91

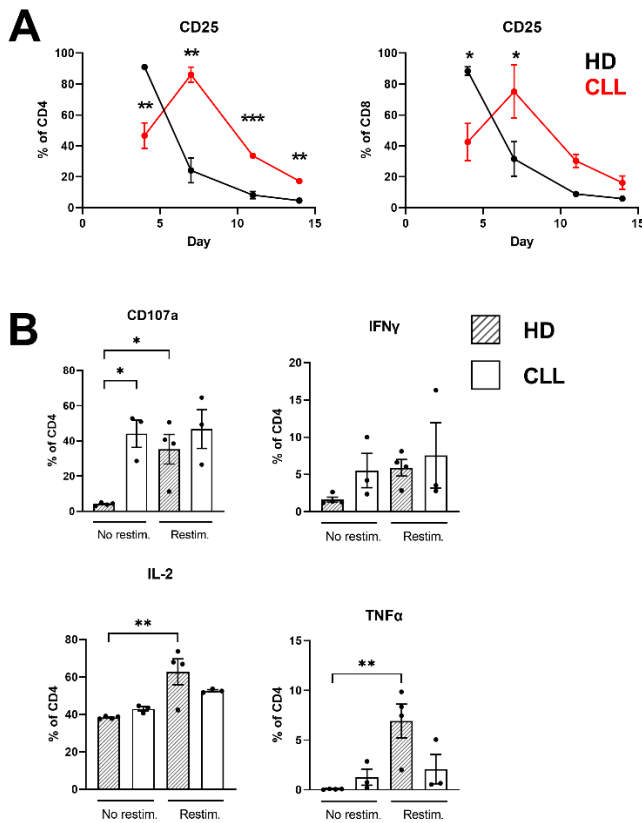

92

93 Supplemental figure 1:

94 (A) PBMCs from HD and CLL patients were stimulated with a single dose of soluble CD3/CD28 antibodies

95 and kept in culture for 14 days. Expression of CD25 was measured during T-cell activation over a period

96 of 14 days (n=3-5). (B) Additionally, after an initial 14 days of stimulation, the T cells were re-stimulated

97 for 2 days and degranulation (CD107a), IFN $\gamma$ , IL-2, and TNF $\alpha$  were measured on CD4 T cells (HD, n=4; CLL,

98 n=3). *P* values were calculated by a 1-way ANOVA, followed by a Šidák's test for multiple comparisons (B).

99 Data are presented as mean  $\pm$  SEM, \**p*≤0.05, \*\**p*≤0.01, \*\*\**p*≤0.001.



## Transwell system set-up

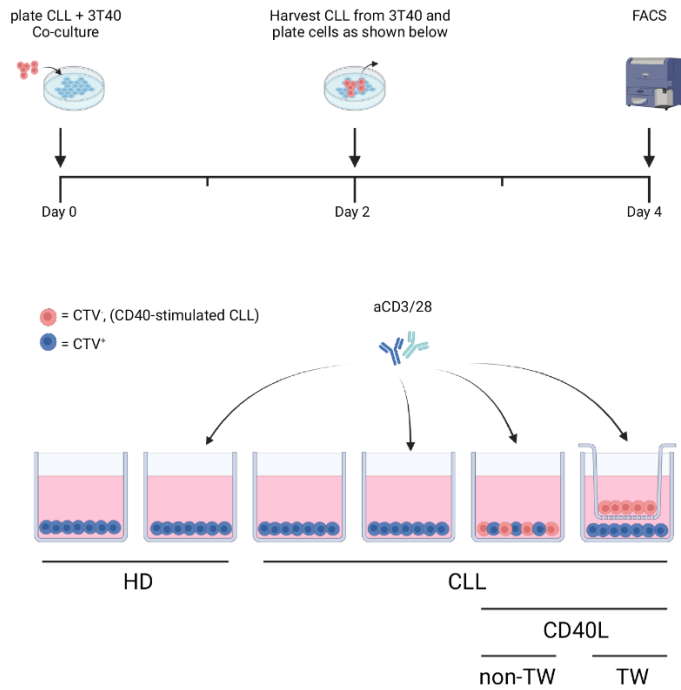

100

### 101 **Supplemental figure 2:**

102 Schematic overview of a transwell experiment to determine the relevance of cell-cell contact of CD40-  
103 stimulated cells on T-cell activation. Red cells indicate CD40-primed CLL cells and blue cells indicate fresh  
104 CLL PBMCs labelled with CTV, these cells are mixed either allowing cell-cell contact or preventing cell-cell  
105 contact due to the transwell insert.

106

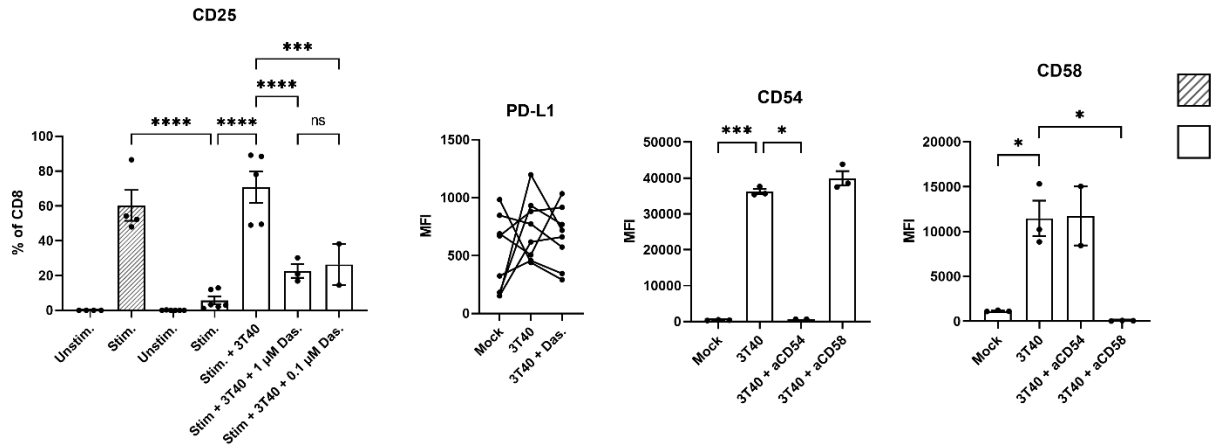

107

108 **Supplemental figure 3:**

109 (A) PBMCs of CLL patients were cultured on a layer of mock or CD40L expressing fibroblasts with or

110 without 1  $\mu$ M or 0.1  $\mu$ M dasatinib and harvested after 2 days. These CLL cells were co-cultured with

111 autologous PBMCs for 2 days with (stim) or without (unstim) CD3/28 antibodies and CD25 expression was

112 measured using FACS analysis afterwards (HD, n=4; CLL, n=2-6). (B) Expression of PD-L1 on CLL cells after

113 a 2 day culture with mock or CD40L-expressing fibroblasts, and with or without dasatinib. (C) Detection of

114 CD54 and CD58 expression on CLL cells after a 2-day culture with or without CD40L-expressing fibroblasts,

115 and with or without CD54 or CD58 blocking antibodies. *P* values were calculated by a 1-way ANOVA,

116 followed by a Šídák's test for multiple comparisons (A-C). Data are presented as mean  $\pm$  SEM, \* $p$  $\leq$ 0.05,

117 \*\*\* $p$  $\leq$ 0.001, \*\*\*\* $p$  $\leq$ 0.0001.

118

**A**

**Contact-dependent genes**

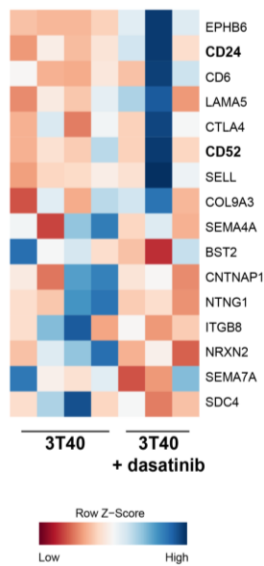

**B**

**Variation of CD24 expression**

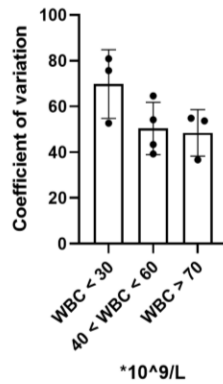

**C**

**CD24**

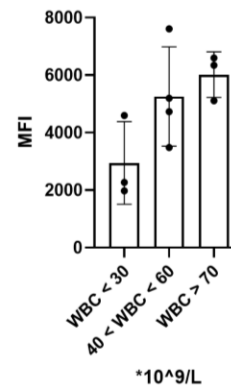

119

120 **Supplemental figure 4:**

121 **(A)** PBMCs from 4 CLL patients were thawed and cultured on a layer of CD40L expressing fibroblasts for 2

122 days with or without 1 uM dasatinib. Heat map showing DESeq2's normalized counts for each patient

123 (column) of genes (rows) that are inversely correlated between the 3T40 vs 3T3 comparison and the 3T40

124 + DAS vs 3T40 comparison. Genes known to be involved in contact-dependent cell-cell interaction were

125 selected. *CD24* and *CD52* were identified as potential targets of interest. **(B)** Variation in CD24 expression

126 on CLL cells from patients in different disease stages. PBMCs from patients in different disease stages

127 indicated by the WBC/leucocyte count in the blood, were thawed and CD24 expression on CLL cells

128 (*CD5+CD19+*) was measured using flow cytometry. **(C)** Geometric Mean fluorescence intensity of CD24 on

129 CLL cells from patients in different disease stages

130

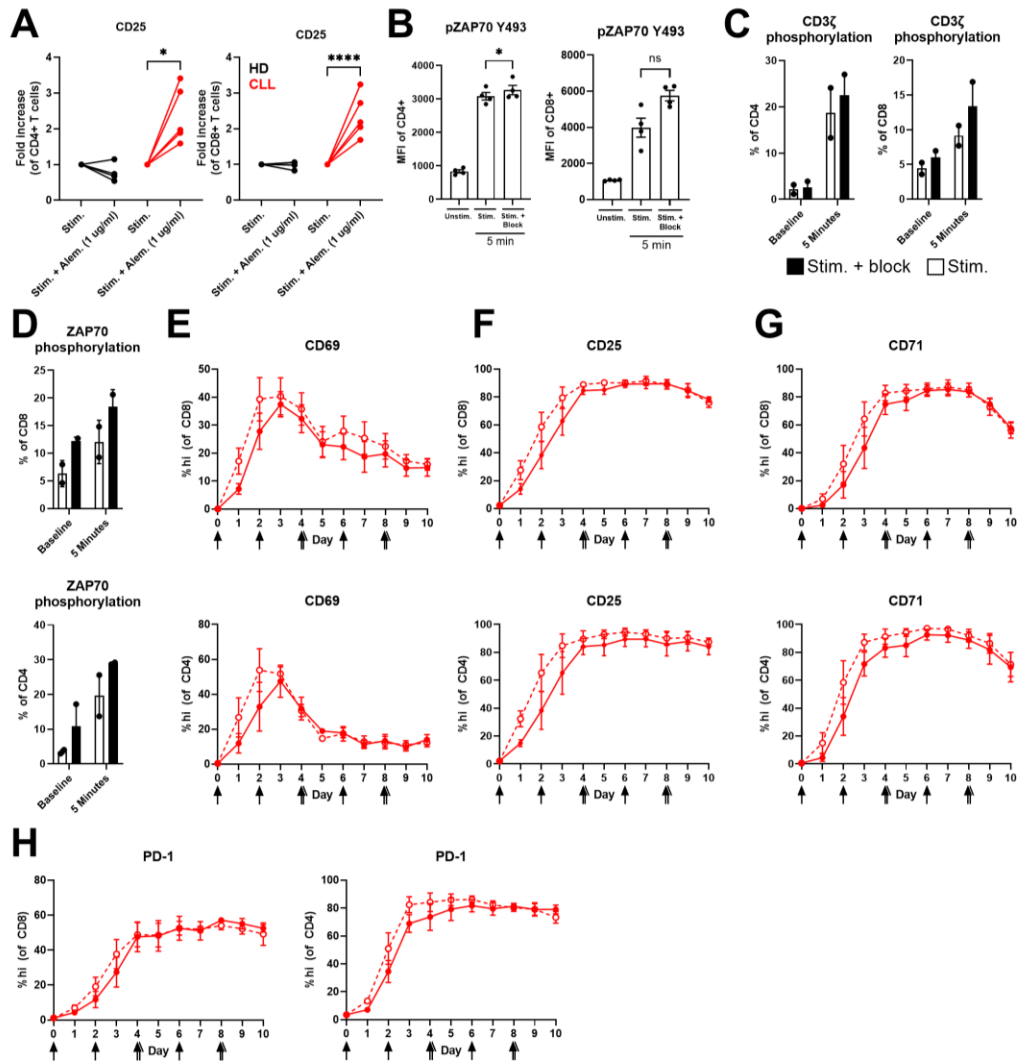

131

132 **Supplemental figure 5:**

133 (A) PBMCs derived from CLL patients and HD were incubated with 1 µg/ml alemtuzumab for 1 hour after  
 134 which T cells were stimulated. T cells were measured for expression of CD25 (HD, n=4; CLL, n=5). (B)  
 135 PBMCs from CLL patients were stimulated using soluble CD3/CD28 antibodies in presence or absence of  
 136 CD24 and CD52 blocking antibodies. Five minutes after activation, the T cells were stained and analyzed  
 137 for phosphorylation of tyrosine residue 493 in ZAP70 (n=4). (C and D) PBMCs from CLL patients were pre-  
 138 incubated for 1 hour with CD24 and CD52 blocking antibodies or without. Next, T-cell stimulation was

139 performed using soluble CD3/CD28 antibodies (baseline and 5 minutes) and CD3 $\zeta$  (C) and ZAP70 (D)  
140 phosphorylation was measured (n=2). (E-H) PBMCs from CLL patients were cultured for 16 days in  
141 presence of a single dose of soluble CD3/CD28 antibodies with or without CD24 and CD52 blocking  
142 antibodies. During the culturing period, T-cell activation (E: CD69, F: CD52, and G: CD71), as well as  
143 expression of PD-1 (H) was measured. Single arrows denote days on which CD24 and CD52 blocking  
144 antibodies were re-added, and double arrows indicate days on which both cell culture medium was  
145 refreshed as well as the addition of fresh CD24 and CD52 blocking antibodies. P values were calculated by  
146 an unpaired or paired t-test (A and B). Data are presented as mean  $\pm$  SEM, \*p $\leq$ 0.05, \*\*\*\*p $\leq$ 0.0001.

147
